# Supplementary material for: Facilely Constructed Two-Sided Microstructure Interfaces Between Electrodes and Cellulose Paper Active Layer: Eco-Friendly, Low-Cost and High-Performance Piezoresistive Sensor
Source: Research Square preprint supplement (doi:10.21203/rs.3.rs-235867/v1), 2021-03-01
Supplement: Supplementary file 1 [file 87f85068527e13f7fea36254.docx]

**Supplementary material**

**Facilely constructed two-sided microstructure interfaces between electrodes and cellulose paper active layer: Eco-friendly, low-cost and high-performance piezoresistive sensor**

Zaihua Duan, Yadong Jiang, Qi Huang, Si Wang, Qiuni Zhao, Yajie Zhang, Bohao Liu, Zhen Yuan, Yang Wang, Huiling Tai*

State Key Laboratory of Electronic Thin Films and Integrated Devices, School of Optoelectronic Science and Engineering, University of Electronic Science and Technology of China (UESTC), Chengdu 610054, P. R. China

**Corresponding author**

*E-mail: [taitai1980@uestc.edu.cn](mailto:taitai1980@uestc.edu.cn) (H. T.).

**
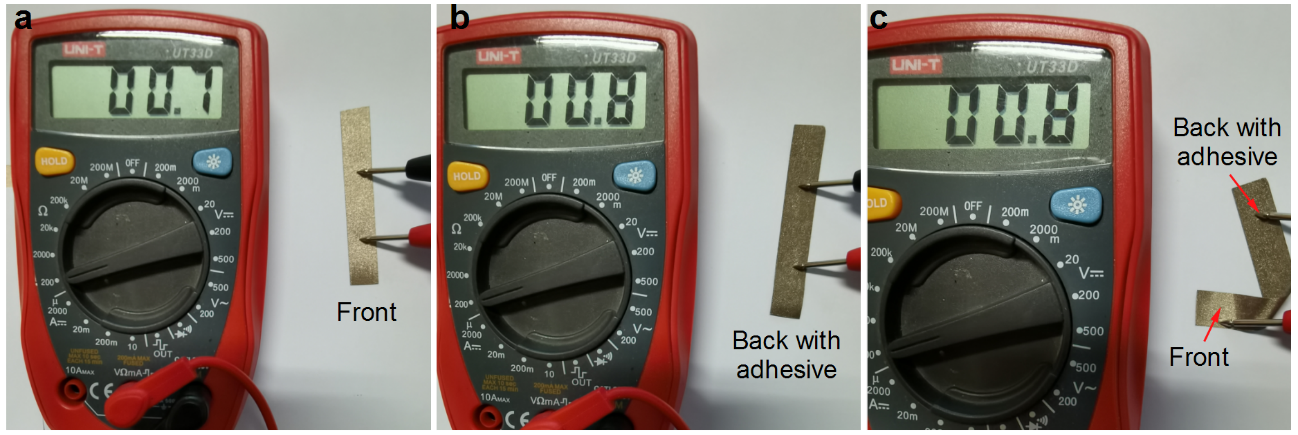
**

**Fig. S1** Resistance test **a** front, **b** back and **c** opposite sides of the conductive adhesive tape. All the resistances (0.7−0.8 Ω) of polyester conductive tape are very small, indicating that the thin layer of adhesive has no effect on its conductivity and the polyester conductive tape can be used as electrode material of the sensor.

**

**

**Fig. S2** XRD patterns of the carbon ink.

**

**

**Fig. S3** Zeta potential of the carbon ink.

**
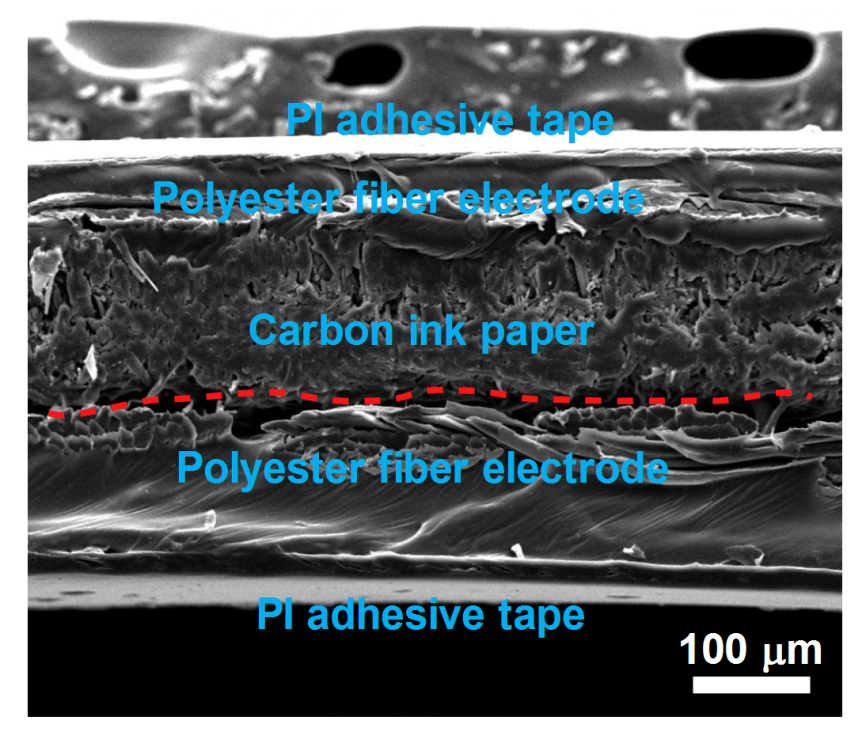
**

**Fig. S4** Cross section SEM image of the sensor S1 with a single-sided microstructure interface.





**Fig. S5** I−V curves of the sensor to different pressures.





**Fig. S6** Current response of the sensor S1 to increased cyclic pressures (0.1−70 kPa), and the inset shows the current response in the low-pressure range of 0.1−0.5 kPa. Operation voltage: 1 V. The current (*I0*) of the sensor is 0.57 mA under no loading pressure.


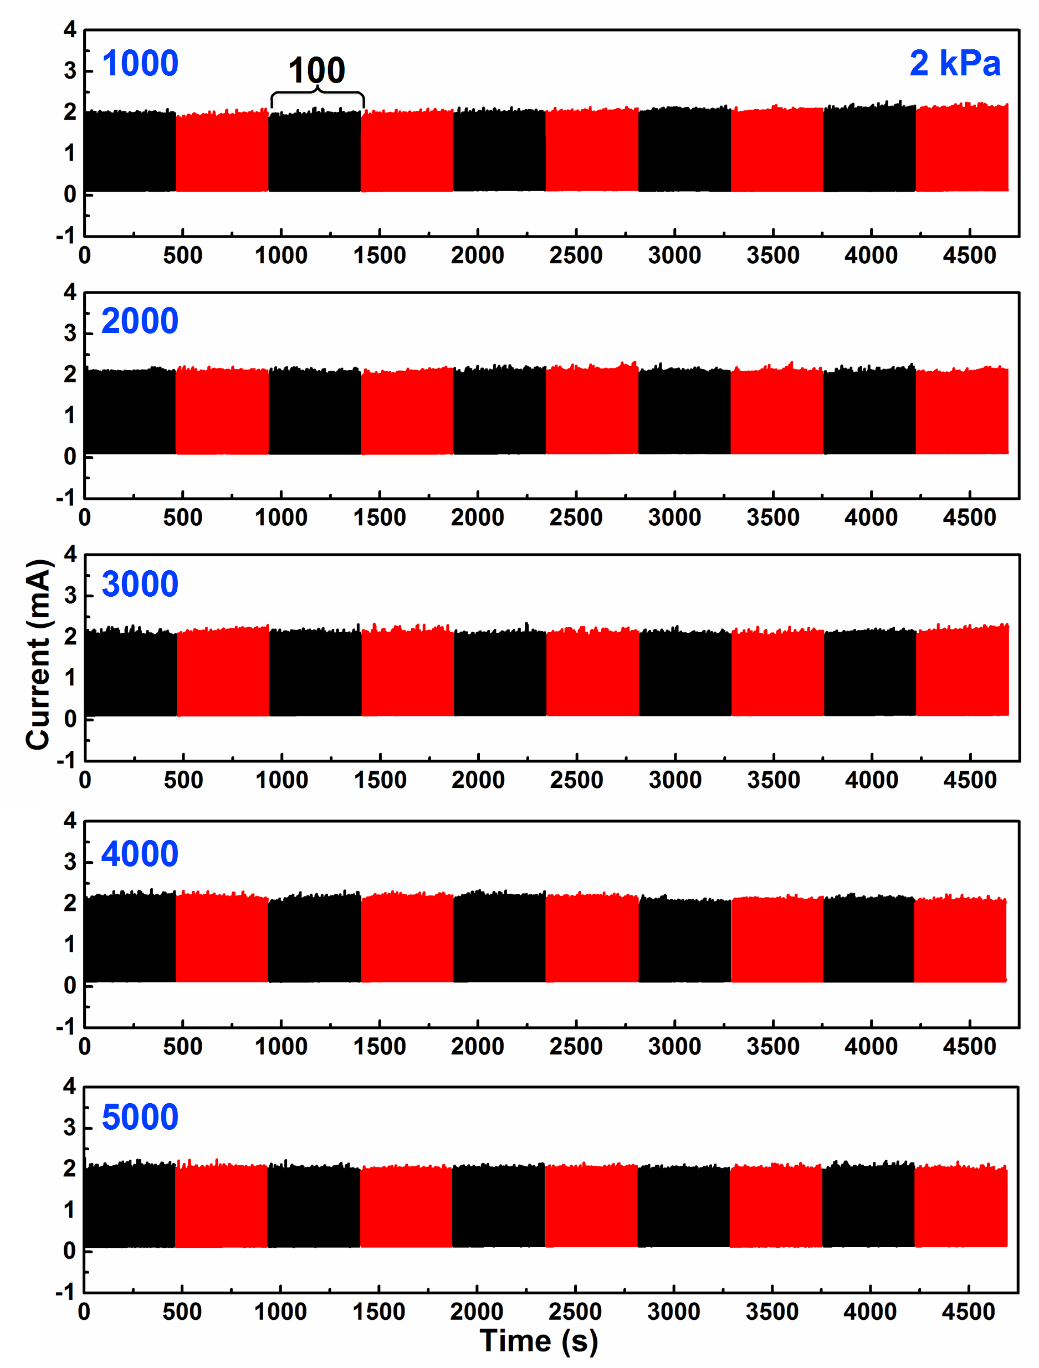


**Fig. S7** Current change curves of the sensor S2 during 1–5000 cycles under the pressure of 2 kPa. Due to the limited storage depth of the Keithley 4200-SCS (only 4000 data can be recorded in one test), 100 cyclic response is recorded in each test and 50 tests are conducted. The total response cycles are 5000 times. Operation voltage: 1 V.


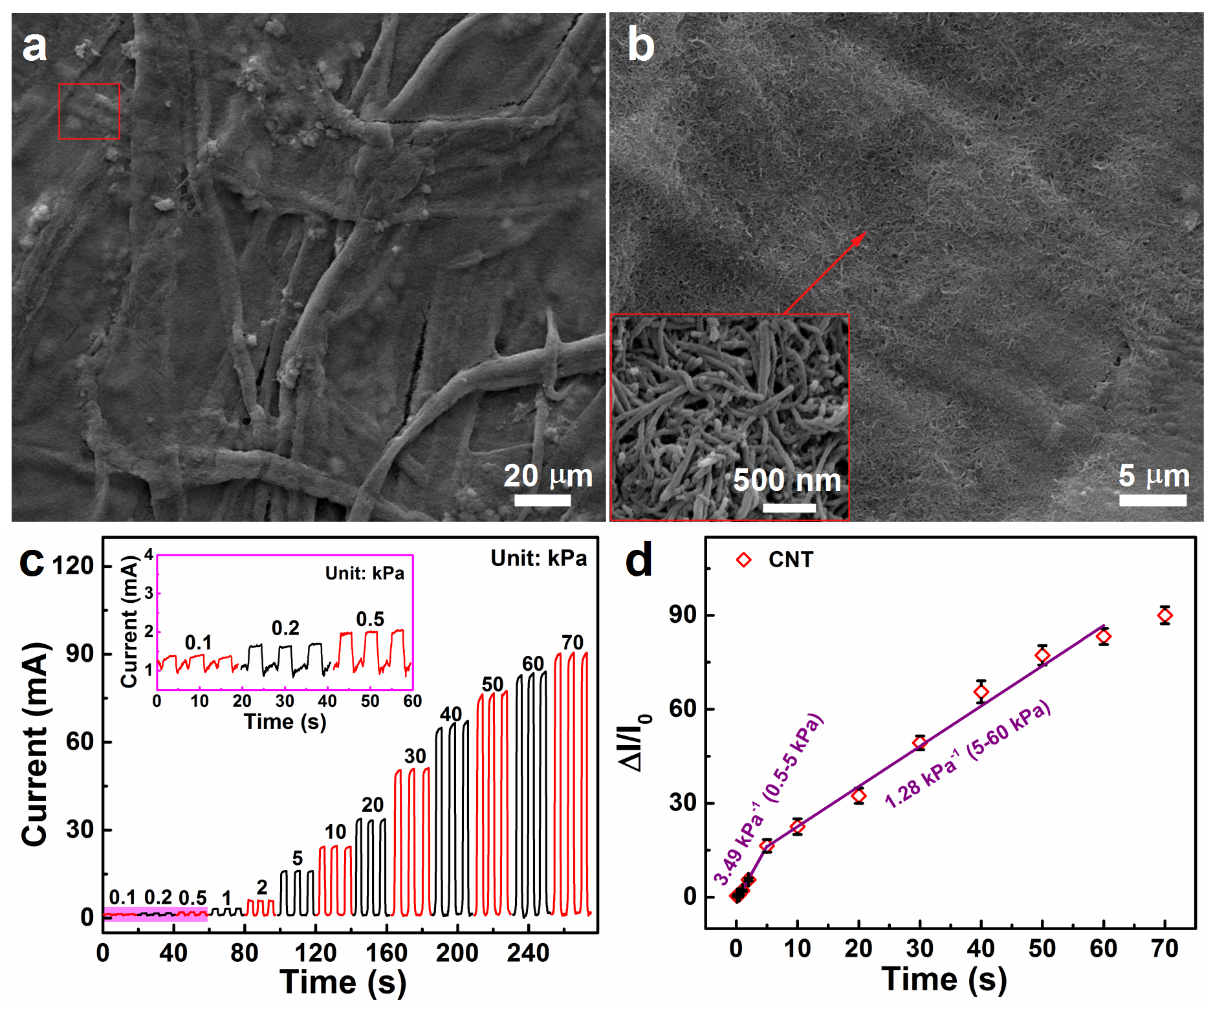


**Fig. S8 a** SEM image of the paper with CNTs. **b** High magnification SEM image. **c** Current response of the sensor to increased cyclic pressures (0.1−70 kPa), and the inset shows the current response in the low-pressure range of 0.1−0.5 kPa. **d** Responses of the sensor to different pressures and corresponding linear fitting curves. Operation voltage: 1 V. The current (*I0*) of the sensor is about 1.1 mA under no loading pressure.

**

**

**Fig. S9** Current response of the sensor to the different temperatures (20−50 °C, produced by heating platform). Operation voltage: 1 V. With the increase of temperature, the sensor current has almost no change.

**Supplementary Movie Captions**

**Movie S1:** Current response of the sensor to different finger pressure in water environment (AVI)

**Movie S2:** Current response of the sensor under the different walking frequency (AVI)
